# Supplementary material
Source: PubMed Central journal article supplement (PMC5248986)
Supplement: DB151274SupplementaryData.pdf [file DB151274SupplementaryData.pdf]

SUPPLEMENTARY DATA

**Supplementary Figure S1. Experimental design and comparison for the general features between Nrf2-KO and WT mice.** (A), insulin resistance. (B) To define the role of Nrf2 in SFN protection from type 2 DCM, 8-week-old male global deletion of Nrf2 gene (Nrf2-KO) mice and their wide-type (WT) C57BL/6J mice were fed high-fat diet (HFD) or normal diet (ND) for 3 months, and then mice were injected intraperitoneally with streptozotocin (STZ) at 100 mg/kg once or the same volume of vehicle (a, sodium citrate buffer), as indicated. Five days after STZ injection, mice with hyperglycemia (fasting blood glucose levels  $\geq 250$  mg/dL) were defined as diabetic. Diabetic and age-matched control mice were treated with sulforaphane (SFN) or vehicle (b, 1% dimethyl sulfoxide) for 5 days each week for 4 months along with their HFD and ND feeding, respectively. After total 7 months treatment of mice, (B) normal Nrf2-KO mice compare with WT mice, (C) the body weight and (D) blood glucose in all groups were measured. Data were presented as means  $\pm$  SD (n=6). \*, p < 0.05 vs. C57.

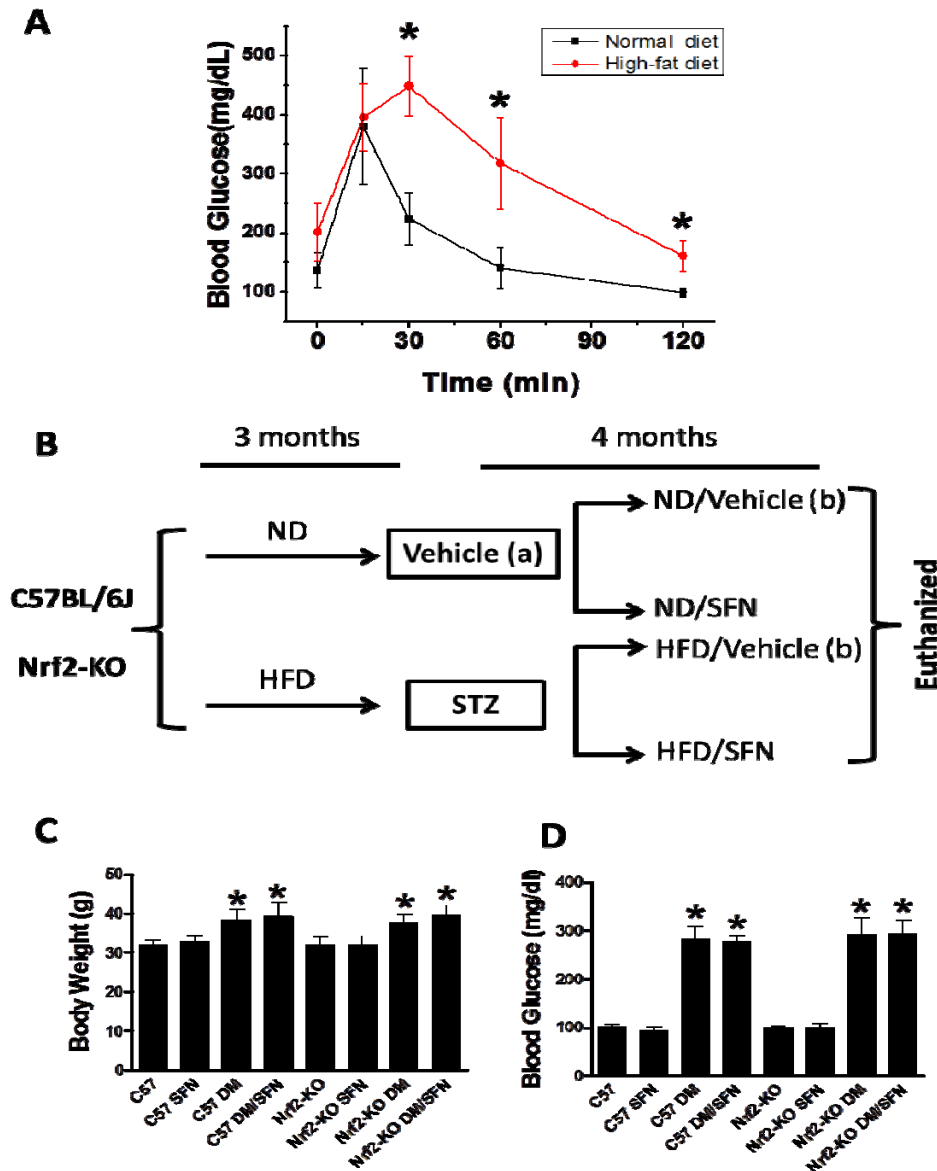

SUPPLEMENTARY DATA

**Supplementary Figure S2. Experimental design and comparison for the general features between WT and MT-KO mice.** (A) To elucidate whether MT is really required for SFN cardiac protection and the protective mechanism of SFN, MT-KO and its WT 129S1 mice were induced to type 2 diabetes as described in Fig. 1. After total 7 months treatment of mice, (B) the body weight and (C) blood glucose in all groups were shown. Data were presented as means  $\pm$  SD (n=6).\*,  $p < 0.05$  vs. 129S.

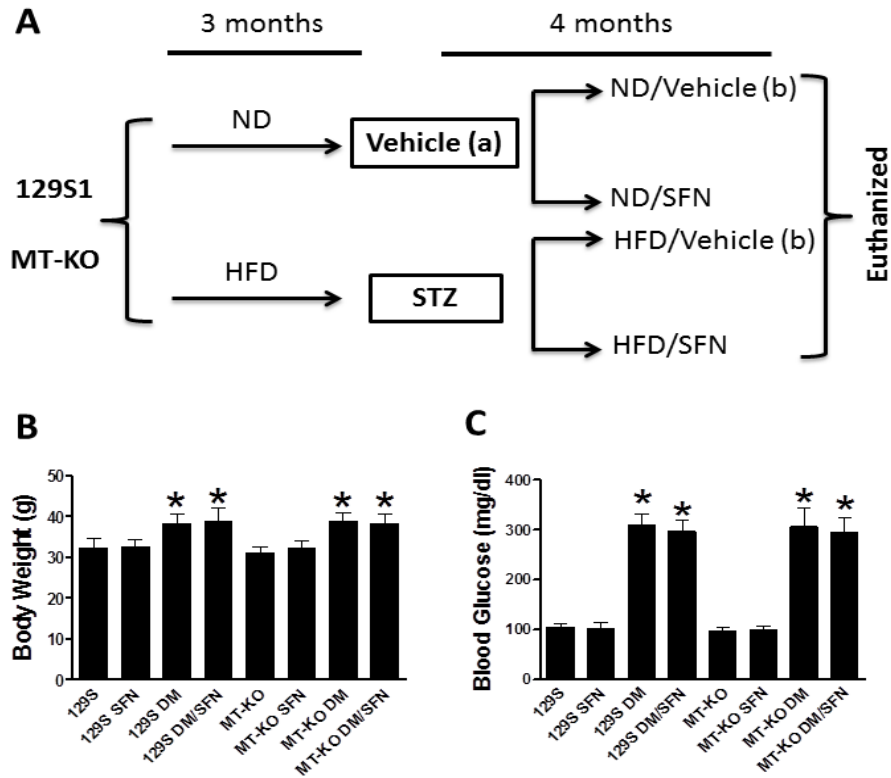

SUPPLEMENTARY DATA

**Supplementary Figure S3. Lack of apoptotic cell death in the heart of mice of WT and Nrf2-KO mice.** Cardiac cell death in different groups was measured by TUNEL assay, and to ensure the TUNEL staining procedure correct, one positive section of the heart tissue from wild-type diabetic mice at 0.5 month after diabetic onset. Images from both WT and Nrf2-KO groups were representatives of the sections from 5 mice for each group

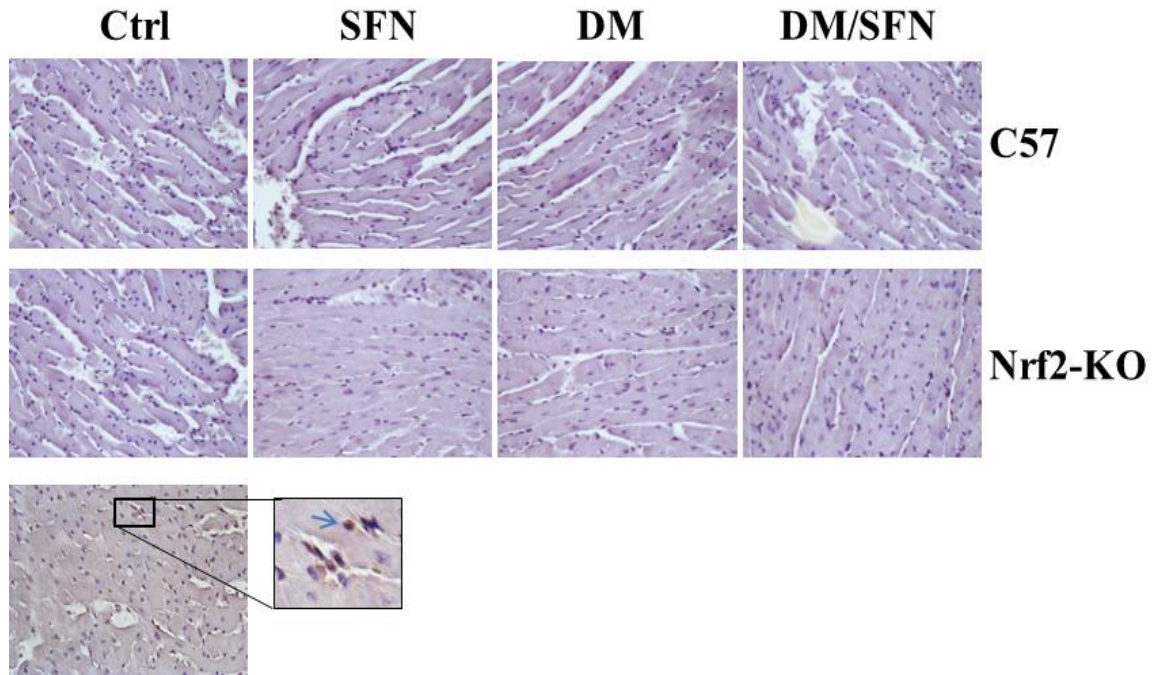

SUPPLEMENTARY DATA

**Supplementary Table 1.** Diabetes-induced functional and pathological changes (fold) between WT and MT-null mice and the decreased percentages of these functional and pathological changes with SFN between WT and MT-null diabetic mice were compared.

|                   | Fold Increase by DM |           | Percentage Decreased by SFN |             |
|-------------------|---------------------|-----------|-----------------------------|-------------|
|                   | 129S                | MT-KO     | 129S/DM                     | MT-KO/DM    |
| Heart weight      | 1.19-1.31           | 1.23-1.46 | 18.67-20.02                 | 15.12-20.27 |
| Myocyte area      | 2.44-2.88           | 2.59-2.76 | 31.89-32.22                 | 28.96-35.28 |
| ANP mRNA          | 2.42-3.37           | 4.75-5.54 | 35.63-62.66                 | 42.90-50.56 |
| $\beta$ -MHC mRNA | 1.98-2.99           | 6.45-7.34 | 47.48-57.63                 | 40.75-42.38 |
| Collagen content  | 2.80-2.97           | 3.92-4.79 | 33.35-37.20                 | 29.93-32.07 |
| CTGF              | 1.54-1.65           | 2.38-2.51 | 28.82-30.70                 | 2.74-4.24   |
| TGF- $\beta$ 1    | 1.68-1.72           | 2.44-2.62 | 32.61-33.67                 | 6.40-7.00   |
| IL-6 mRNA         | 2.47-2.69           | 7.18-7.79 | 45.13-50.03                 | 45.24-49.51 |
| MCP-1 mRNA        | 2.06-2.47           | 5.22-6.60 | 60.30-61.51                 | 49.56-70.32 |
| 8-OHdG            | 1.60-1.78           | 2.59-3.15 | 23.72-29.55                 | 22.37-25.16 |
| MDA               | 2.17-2.32           | 2.25-2.74 | 25.97-28.80                 | 24.22-25.34 |
